# Supplementary material for: NMR investigations on binding and dynamics of imidazolium-based ionic liquids with HEWL
Source: Royal Society of Chemistry journal article supplement (doi:10.1039/d0cp04584e), 2020-01-01
Supplement: d0cp04584e1.pdf [file d0cp04584e1.pdf]

## Electronic supplementary information (ESI)

### NMR investigations on binding and dynamics of imidazolium-based ionic liquids with HEWL

R. Ravikanth Reddy,<sup>a,b</sup> Jithender G Reddy,<sup>\*,b,c</sup> B. V. N. Phani Kumar<sup>\*,a,b</sup>

<sup>a</sup>NMR, Centre for Analysis, Testing, Evaluation & Reporting Services (CATERS),  
CSIR–Central Leather Research Institute, Chennai - 600020, India.

<sup>b</sup>Academy of Scientific and Innovative Research (AcSIR), Ghaziabad–201002, India.

Emails: [bvnphani@gmail.com](mailto:bvnphani@gmail.com); [phanikumar@clri.res.in](mailto:phanikumar@clri.res.in).

<sup>c</sup>NMR Division, Department of Analytical & Structural Chemistry, CSIR-Indian Institute of  
Chemical Technology, Hyderabad - 500007, India.

Emails: [gjreddy08@gmail.com](mailto:gjreddy08@gmail.com); [gjreddy@iict.res.in](mailto:gjreddy@iict.res.in).

<sup>\*</sup>Corresponding author emails: [bvnphani@gmail.com](mailto:bvnphani@gmail.com); [phanikumar@clri.res.in](mailto:phanikumar@clri.res.in).

---

## Figure captions

**Fig. S1** CD spectra of HEWL in the absence and presence of ILs. The concentration of each IL and HEWL used were 2 mM and 10  $\mu$ M, respectively.

**Fig. S2** Stock plot of  $^1\text{H}$  NMR spectra of aqueous HEWL (50  $\mu$ M) in the absence and presence of ILs: control (Blue), IL1 (Red), IL2 (Green) and IL3 (Magenta). The concentration of ILs used were 5 mM in each case.

**Fig. S3** Variable-temperature selective and non-selective spin-lattice relaxation rates ( $R_{\text{1SEL}}$  and  $R_{\text{1NS}}$ ) for aqueous IL2 (5 mM) in the presence of HEWL (50  $\mu$ M). Proton resonance of  $\alpha\text{-CH}_2$  (H1') of IL2 was chosen.

**Fig. S4**  $^{35}\text{Cl}$  NMR spectra of (A) IL3 and (B) NaCl recorded with (i) 0  $\mu$ M, (ii) 5  $\mu$ M, (iii) 25  $\mu$ M and (iv) 50  $\mu$ M concentrations of HEWL at 25°C.

**Fig. S5** (A) Residues showing significant (deep blue spheres) and moderate (light blue spheres) chemical shift perturbations (CSPs) observed in IL1 titration with HEWL labelled on crystal structure (PDB ID: 2vb1). (B) Specific residue stretch (G104-V109) showing interaction with IL2 is highlighted in blue colour on crystal structure of HEWL. Secondary structural elements: helix, sheet and loops are coloured in red, yellow and green, respectively.

## Table captions

**Table S1.** pH data measured on various HEWL/IL/water mixtures.

**Table S2.** Selective and nonselective spin relaxation rates ( $R_{1NS}$  and  $R_{1SEL}$ ) of IL (5 mM)/HEWL/D<sub>2</sub>O mixtures against [HEWL] at 25°C. Proton resonances of –OCH<sub>3</sub> (H1') of IL1, α-CH<sub>2</sub> (H1') of IL2 and α-CH<sub>2</sub> (H7) of IL3 were chosen.

**Table S3.** <sup>1</sup>H Self-diffusion coefficient of water (at 25°C) in aqueous HEWL-IL mixtures. Here the [HEWL] was fixed at 5 mM, while [IL] was varied.

**Table S4.** Spin-lattice relaxation rates of IL (5 mM)/HEWL (50 μM)/D<sub>2</sub>O mixtures measured with ( $R_{1irr}$ ) and without ( $R_{1non-irr}$ ) irradiation using DIRECTION NMR (at 25°C).

**Table S5.** Spin relaxation rates of IL3 (<sup>35</sup>Cl) and NaCl (both <sup>23</sup>Na and <sup>35</sup>Cl) as a function of [HEWL] at 25°C.

## **Circular Dichroism (CD)**

CD measurements were carried out by using JASCO J-815 (B047461168) spectropolarimeter at 25°C. CD spectra were recorded for 500  $\mu$ L HEWL-IL mixtures with concentrations of 10  $\mu$ M HEWL and 2 mM ligand in water using a quartz cell with path length of 10 mm. Here the concentration of ILs were limited due to high HT voltage saturation at concentrations higher than 2 mM. CD data were collected from 190 to 260 nm (far UV-region) with an average of three scans. The band width and response time were chosen as 1 nm and 1 s, respectively.

### **Impact of ILs on secondary structure of HEWL**

Before attempting ligand based NMR studies, CD measurements were carried out on HEWL as well as in the presence of ILs to monitor the influence of chosen ILs on the protein stability in terms of secondary structural changes.<sup>1-4</sup> The related CD data and observations are provided in Fig. S1. CD spectra of HEWL show a characteristic helical structure, negative double minima at 208 and 220 nm (in the far UV region) in the absence and presence of ILs. For IL3, the far-UV CD spectrum of HEWL is very similar to that of native HEWL. A feeble change in the CD pattern is noticed for IL1, where molar ellipticity is shifted to positive side indicating a slight change in secondary structure. However, more positive shift tendency of IL2 indicates a moderate change in the secondary structure of HEWL relative to IL1, which could be attributed to the presence of longer alkyl (octyl chain) in IL2. It may be concluded that the secondary structural conformation of HEWL is not significantly influenced by the concentration of ILs used, albeit the moderate decrease of molar ellipticity observed for IL2. CD results further verified with the analysis of <sup>1</sup>H NMR spectra (vide infra).

<sup>1</sup>H NMR spectra of HEWL (recorded in 90% H<sub>2</sub>O and 10% D<sub>2</sub>O) in the presence of individual IL1, IL2 and IL3 have been recorded with good signal to noise ratio for protein

(~20000 scans), with a view to probe the changes in HEWL secondary structure induced by ILs (Fig. S2). It is clear that the amide resonances of HEWL in the region from 6 – 11 ppm do not reflect any loss of secondary structures in protein at the give concentrations of ILs used in this study (Fig. S2).

For protein-based NMR experiments,  $^1\text{H}$ - $^{15}\text{N}$  HSQC has been utilized to gauge the protein stability by monitoring amide region (~ 6 to 11 ppm in  $^1\text{H}$  dimension). Even at the highest concentration of ILs under study, we did not notice any notable collapse in –NH region which indicates that the secondary structure of HEWL is still retained. Based on the above, we would like to mention that the protein stability issue is clearly verified and we are confident that the protein is stable during our NMR measurements. Such  $^1\text{H}$ - $^{15}\text{N}$  HSQC NMR reports to verify the protein stability in terms of secondary structure of four bundle helix protein *Im7* in the presence of imidazolium ILs were also discussed in earlier publication by Figueiredo et. al.<sup>5</sup>

The CD results taken together with those of  $^1\text{H}$  NMR clearly supports the native structure of HEWL is not significantly perturbed by studied ILs. However, a residual perturbation from native structure is noticed for IL2 by CD, while such a remark is not evident from NMR. All the above observations render the protein stability, which is an essential pre-requisite for the success of protein-ligand study.

## References

1. B. Mandal, S. Mondal, A. Pan, S. P. Moulik and S. Ghosh, *Colloids Surfaces A*, 2015, **484**, 345–353.
2. B. Mandal, S. Ghosh and S. P. Moulik, *Colloids Surfaces A*, 2017, **522**, 266–271.
3. L. Satish, S. Rana, M. Arakha, L. Rout, B. Ekka, S. Jha, P. Dash and H. Sahoo, *Spectroscopy Lett.*, 2016, **49**, 383–390.

4. M. M. Islam, S. Barik, N. Preeyanka and M. Sarkar, *J. Phys. Chem. B*, 2020, **124**, 961-973.
5. A. M. Figueiredo, J. Sardinha, G. R. Moore and E. J. Cabrita, *Phys. Chem. Chem. Phys.*, 2013, **15**, 19632–19643.

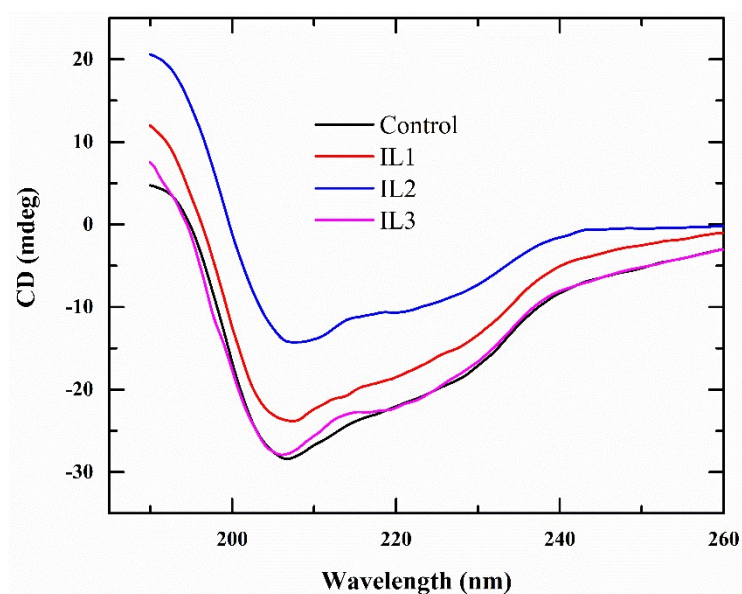

**Fig. S1** CD spectra of HEWL in the absence and presence of ILs. The concentration of each IL and HEWL used were 2 mM and 10  $\mu$ M, respectively.

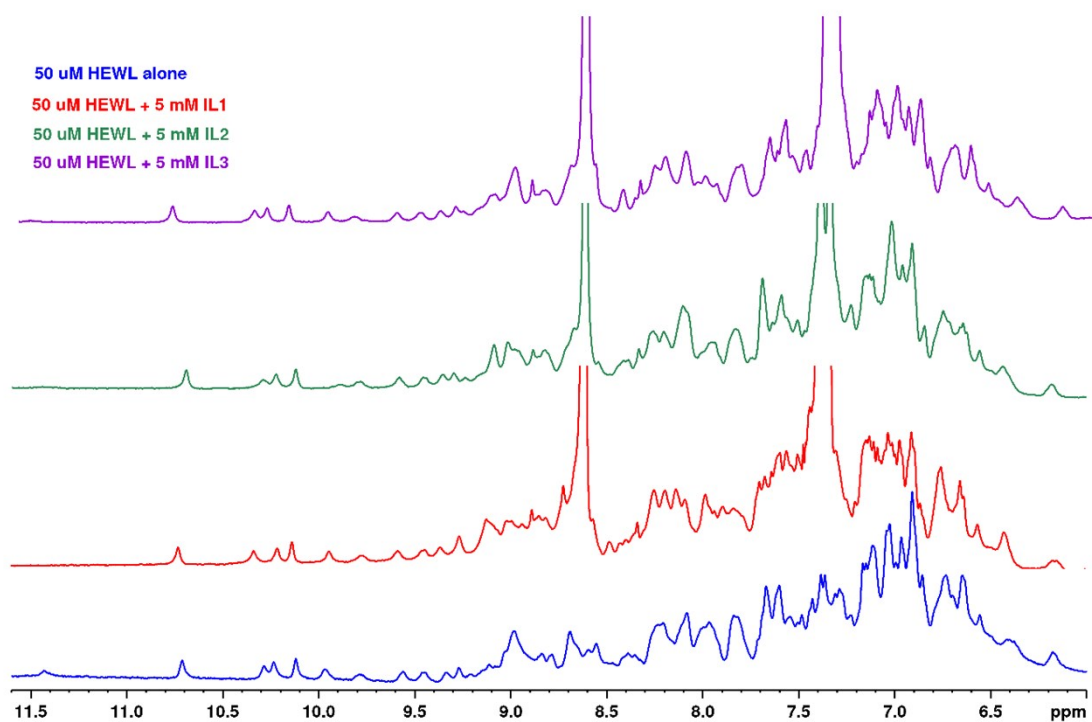

**Fig. S2** Stock plot of  $^1\text{H}$  NMR spectra of aqueous HEWL (50  $\mu$ M) in the absence and presence of ILs: control (Blue), IL1 (Red), IL2 (Green) and IL3 (Magenta). The concentration of ILs used were 5 mM in each case.

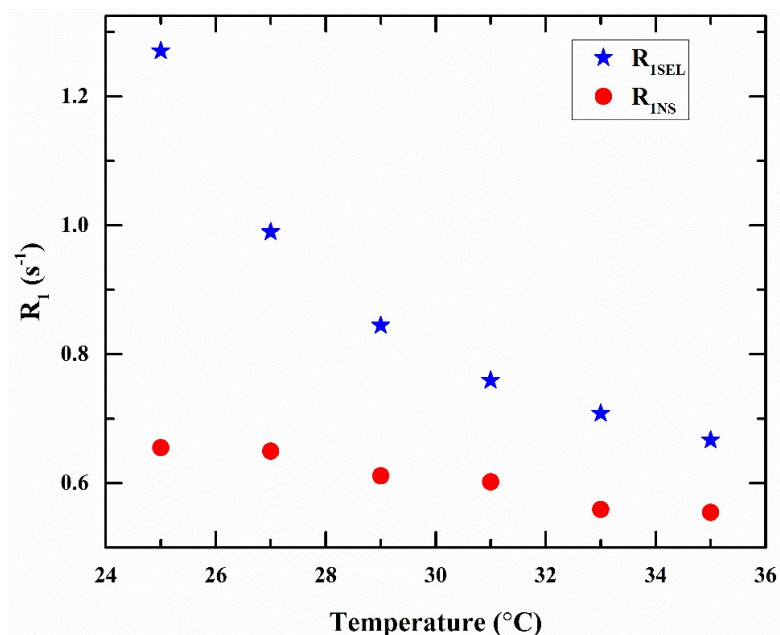

**Fig. S3** Variable-temperature selective and non-selective spin-lattice relaxation rates ( $R_{1\text{SEL}}$  and  $R_{1\text{INS}}$ ) for aqueous IL2 (5 mM) in the presence of HEWL (50  $\mu\text{M}$ ). Proton resonance of  $\alpha\text{-CH}_2$  (H1') of IL2 was chosen.

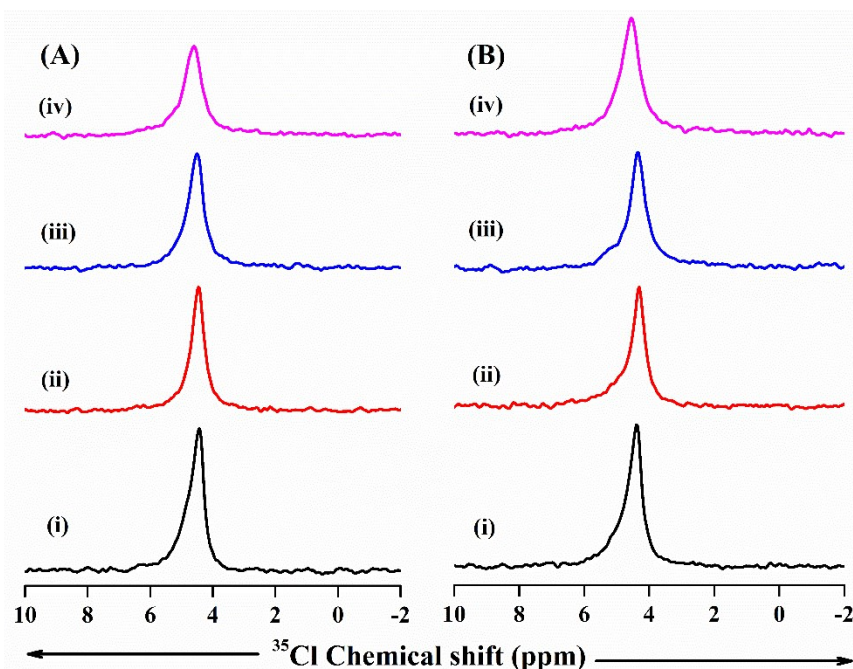

**Fig. S4**  $^{35}\text{Cl}$  NMR spectra of (A) IL3 and (B) NaCl recorded with (i) 0  $\mu\text{M}$ , (ii) 5  $\mu\text{M}$ , (iii) 25  $\mu\text{M}$  and (iv) 50  $\mu\text{M}$  concentrations of HEWL at 25°C.

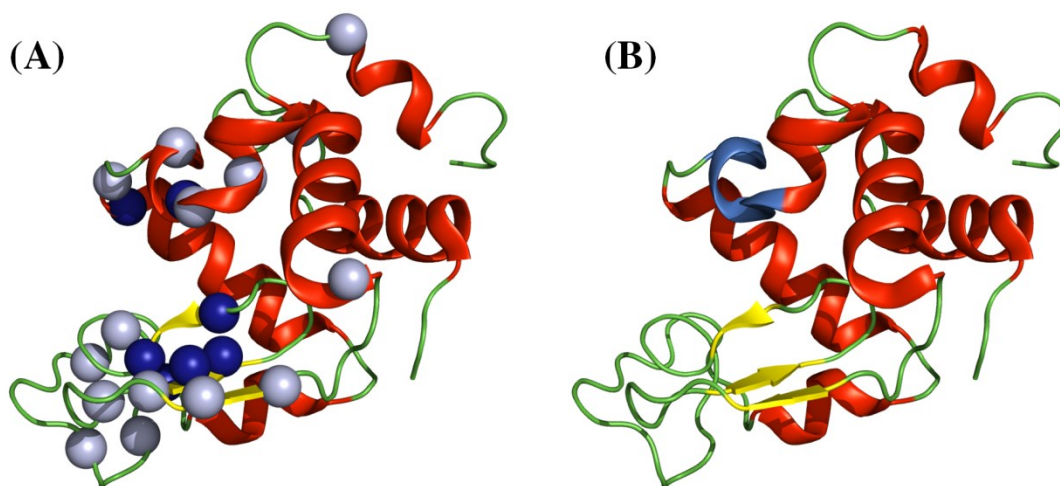

**Fig. S5** (A) Residues showing significant (deep blue spheres) and moderate (light blue spheres) chemical shift perturbations (CSPs) observed in IL1 titration with HEWL labelled on crystal structure (PDB ID: 2vb1). (B) Specific residue stretch (G104-V109) showing interaction with IL2 is highlighted in blue colour on crystal structure of HEWL. Secondary structural elements: helix, sheet and loops are coloured in red, yellow and green, respectively.

**Table S1.** pH data measured on various HEWL/IL/water mixtures.

| S. No. | HEWL | IL          | Solvent                                    | Measured pH |
|--------|------|-------------|--------------------------------------------|-------------|
| 1      | -    | -           | 90% H <sub>2</sub> O/10% D <sub>2</sub> O* | 7.2         |
| 2      | 5 mM | -           | 90% H <sub>2</sub> O/10% D <sub>2</sub> O  | 3.95        |
| 3      | -    | IL1 (50 mM) | 90% H <sub>2</sub> O/10% D <sub>2</sub> O  | 3.52        |
| 4      | -    | IL2 (10 mM) | 90% H <sub>2</sub> O/10% D <sub>2</sub> O  | 4.14        |
| 5      | -    | IL3 (20 mM) | 90% H <sub>2</sub> O/10% D <sub>2</sub> O  | 5.49        |
| 6      | 5 mM | IL1 (50 mM) | 90% H <sub>2</sub> O/10% D <sub>2</sub> O  | 3.96        |
| 7      | 5 mM | IL2 (10 mM) | 90% H <sub>2</sub> O/10% D <sub>2</sub> O  | 4.0         |
| 8      | 5 mM | IL3 (20 mM) | 90% H <sub>2</sub> O/10% D <sub>2</sub> O  | 4.01        |

\*Uncorrected for deuterium isotope effect

**Table S2.** Selective and nonselective spin relaxation rates ( $R_{\text{INS}}$  and  $R_{\text{ISEL}}$ ) of IL (5 mM)/HEWL/D<sub>2</sub>O mixtures against [HEWL] at 25°C. Proton resonances of –OCH<sub>3</sub> (H1') of IL1,  $\alpha$ -CH<sub>2</sub> (H1') of IL2 and  $\alpha$ -CH<sub>2</sub> (H7) of IL3 were chosen.

| HEWL       | IL1              |                   | HEWL    | IL2              |                   | HEWL    | IL3              |                   |
|------------|------------------|-------------------|---------|------------------|-------------------|---------|------------------|-------------------|
| [ $\mu$ M] | $R_{\text{INS}}$ | $R_{\text{ISEL}}$ | $\mu$ M | $R_{\text{INS}}$ | $R_{\text{ISEL}}$ | $\mu$ M | $R_{\text{INS}}$ | $R_{\text{ISEL}}$ |
| 0          | 0.1184           | 0.118             | 0       | 0.55             | 0.488             | 0       | 0.39             | 0.353             |
| 10         | 0.120            | 0.117             | 1       | 0.532            | 0.512             | 10      | 0.389            | 0.340             |
| 30         | 0.124            | 0.118             | 2.5     | 0.567            | 0.513             | 30      | 0.38             | 0.358             |
| 50         | 0.122            | 0.115             | 10      | 0.565            | 0.522             | 50      | 0.39             | 0.357             |
| 70         | 0.125            | 0.118             | 15      | 0.56             | 0.52              | 70      | 0.395            | 0.36              |
| 90         | 0.124            | 0.120             | 30      | 0.60             | 0.55              | 90      | 0.40             | 0.37              |
| 110        | 0.127            | 0.120             | 50      | 0.62             | 0.57              | 110     | 0.40             | 0.37              |
| 140        | 0.123            | 0.125             | 70      | 0.560            | 0.57              | 140     | 0.407            | 0.37              |
| 170        | 0.133            | 0.126             | 90      | 0.565            | 0.60              | 170     | 0.425            | 0.383             |
| 200        | 0.137            | 0.134             | 110     | 0.597            | 0.62              | 200     | 0.42             | 0.387             |
| 230        | 0.140            | 0.134             | 140     | 0.632            | 0.66              | 230     | 0.42             | 0.380             |
| 260        | 0.142            | 0.134             | 170     | 0.657            | 0.71              | 260     | 0.42             | 0.395             |
| 300        | 0.140            | 0.133             | 200     | 0.65             | 0.832             | -       | -                | -                 |
| -          | -                | -                 | 230     | 0.666            | 0.870             | -       | -                | -                 |
| -          | -                | -                 | 260     | 0.656            | 0.98              | -       | -                | -                 |
| -          | -                | -                 | 300     | 0.701            | 1.332             | -       | -                | -                 |

**Table S3.**  $^1\text{H}$  Self-diffusion coefficient of water (at  $25^\circ\text{C}$ ) in aqueous HEWL-IL mixtures.

Here the [HEWL] was fixed at 5 mM, while [IL] was varied.

| S. No. | Mixture                                 | $D/10^{-9}$<br>( $\text{m}^2\text{s}^{-1}$ ) |
|--------|-----------------------------------------|----------------------------------------------|
| 1      | HEWL/ $\text{D}_2\text{O}$              | 1.744                                        |
| 2      | HEWL/IL1 (0.5 mM)/ $\text{D}_2\text{O}$ | 1.776                                        |
| 3      | HEWL/IL1 (5 mM)/ $\text{D}_2\text{O}$   | 1.762                                        |
| 4      | HEWL/IL1 (10 mM)/ $\text{D}_2\text{O}$  | 1.728                                        |
| 5      | HEWL/IL2 (0.5 mM)/ $\text{D}_2\text{O}$ | 1.751                                        |
| 6      | HEWL/IL2 (5 mM)/ $\text{D}_2\text{O}$   | 1.786                                        |
| 7      | HEWL/IL2 (10 mM)/ $\text{D}_2\text{O}$  | 1.764                                        |
| 8      | HEWL/IL3 (0.5 mM)/ $\text{D}_2\text{O}$ | 1.793                                        |
| 9      | HEWL/IL3 (5 mM)/ $\text{D}_2\text{O}$   | 1.773                                        |
| 10     | HEWL/IL3 (10 mM)/ $\text{D}_2\text{O}$  | 1.818                                        |

**Table S4.** Spin-lattice relaxation rates of IL (5 mM)/HEWL (50  $\mu$ M)/D<sub>2</sub>O mixtures measured with ( $R_{1\text{irr}}$ ) and without ( $R_{1\text{non-irr}}$ ) irradiation using DIRECTION NMR (at 25°C).

| IL1    |                           |                          | IL2                             |                           |                          | IL3    |                           |                          |
|--------|---------------------------|--------------------------|---------------------------------|---------------------------|--------------------------|--------|---------------------------|--------------------------|
| Proton | Off<br>$R_1$ ( $s^{-1}$ ) | On<br>$R_1$ ( $s^{-1}$ ) | Proton                          | Off<br>$R_1$ ( $s^{-1}$ ) | On<br>$R_1$ ( $s^{-1}$ ) | Proton | Off<br>$R_1$ ( $s^{-1}$ ) | On<br>$R_1$ ( $s^{-1}$ ) |
| Cation |                           |                          |                                 |                           |                          |        |                           |                          |
| H4     | 0.131                     | 0.135                    | H4                              | 0.129                     | 0.129                    | H4     | 0.129                     | 0.132                    |
| H5     | 0.113                     | 0.118                    | H5                              | 0.111                     | 0.111                    | H5     | 0.113                     | 0.115                    |
| H6     | 0.255                     | 0.258                    | H6                              | 0.257                     | 0.263                    | H6     | 0.251                     | 0.262                    |
| H7     | 0.38                      | 0.384                    | H7                              | 0.393                     | 0.414                    | H7     | 0.367                     | 0.414                    |
| H8     | 0.373                     | 0.375                    | H8                              | 0.381                     | 0.383                    | H8     | 0.368                     | 0.375                    |
| H9     | 0.338                     | 0.343                    | H9                              | --                        | --                       | H9     | 0.335                     | 0.340                    |
| H10    | 0.310                     | 0.321                    | H10                             | 0.310                     | 0.315                    | H10    | 0.308                     | 0.312                    |
| Anion  |                           |                          |                                 |                           |                          |        |                           |                          |
| H1'    | 0.117                     | 0.121                    | H8'                             | 0.376                     | 0.413                    | -      | -                         | -                        |
| -      | -                         | -                        | (CH <sub>2</sub> ) <sub>n</sub> | 0.480                     | 0.492                    | -      | -                         | -                        |
| -      | -                         | -                        | H2'                             | 0.688                     | 0.706                    | -      | -                         | -                        |
| -      | -                         | -                        | H1'                             | 0.527                     | 0.597                    | -      | -                         | -                        |

**Table S5.** Spin relaxation rates of IL3 ( $^{35}\text{Cl}$ ) and NaCl (both  $^{23}\text{Na}$  and  $^{35}\text{Cl}$ ) as a function of [HEWL] at 25°C.

| HEWL<br>[ $\mu\text{M}$ ] | $R_1$ ( $\text{s}^{-1}$ )   |                             |                             |
|---------------------------|-----------------------------|-----------------------------|-----------------------------|
|                           | $^{35}\text{Cl}^{\text{a}}$ | $^{23}\text{Na}^{\text{b}}$ | $^{35}\text{Cl}^{\text{c}}$ |
| 0                         | 28.00                       | 16.37                       | 24.89                       |
|                           | (0.4)                       | (0.10)                      | (0.7)                       |
| 5                         | 34.10                       | 16.35                       | 25.75                       |
|                           | (1.15)                      | (0.08)                      | (0.89)                      |
| 25                        | 41.68                       | 16.38                       | 41.80                       |
|                           | (1.25)                      | (0.08)                      | (1.67)                      |
| 50                        | 52.80                       | 16.12                       | 49.18                       |
|                           | (1.84)                      | (0.11)                      | (1.13)                      |

<sup>a</sup> 1-butyl 3-methylimidazolium chloride (IL3)  
<sup>b, c</sup> Sodium Chloride (NaCl)
